# Supplementary material for: Transgenic shRNA pigs reduce susceptibility to foot and mouth disease virus infection
Source: eLife journal article supplement (doi:10.7554/elife.06951), 2015-06-19
Supplement: supp [file elife-06951-supp-v1.zip]

Archive with 3 entries (3 files):
- elife_poa_e06951_Figure_4_figure_supplement_1.pdf
- elife_poa_e06951_Supplementary_File_1.docx
- elife_poa_e06951_Figure_2_figure_supplement_1.pdf
