# Supplementary material for: Transgenic shRNA pigs reduce susceptibility to foot and mouth disease virus infection
Source: eLife journal article supplement (doi:10.7554/elife.06951), 2015-06-19
Supplement: supp [file elife-06951-supp-v1.zip › elife_poa_e06951_Figure_2_figure_supplement_1.pdf]

A

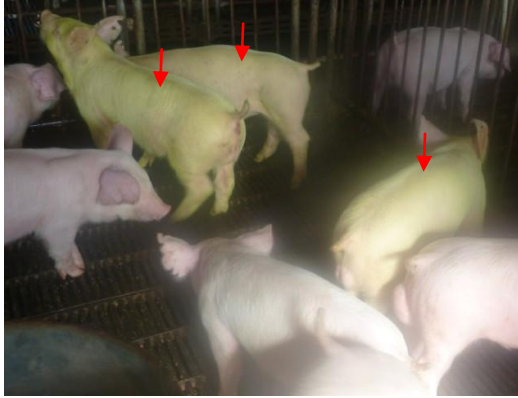

B

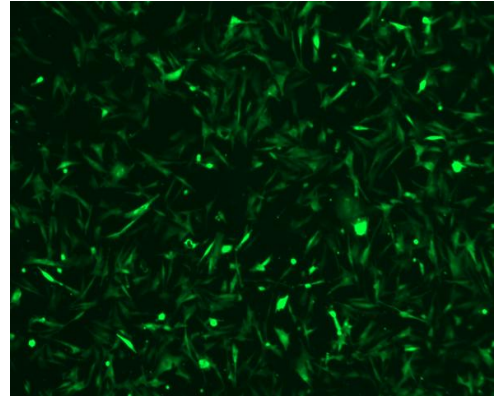

**Figure 2-figure supplement 1.**

**Pictures of transgenic pigs and EGFP expression in the fibroblast cells.**

(A) EGFP of transgenic pigs (red arrows) under natural light. (B) Expression of EGFP in ear fibroblasts isolated from transgenic pigs.
