# Supplementary material for: Transgenic shRNA pigs reduce susceptibility to foot and mouth disease virus infection
Source: eLife journal article supplement (doi:10.7554/elife.06951), 2015-06-19
Supplement: supp [file elife-06951-supp-v1.zip › elife_poa_e06951_Figure_4_figure_supplement_1.pdf]

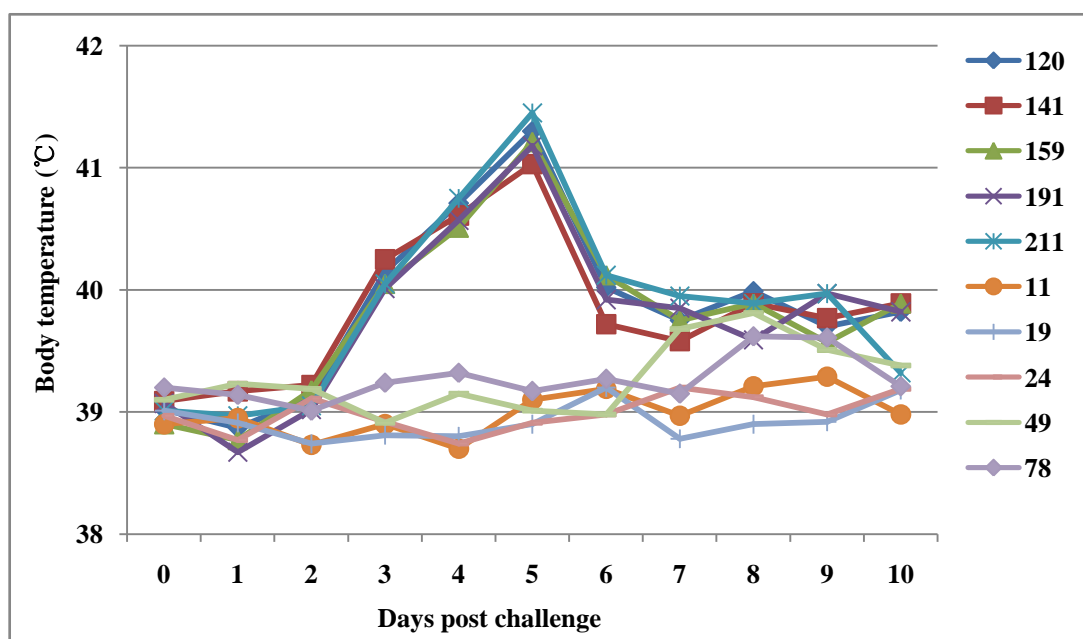

**Figure 4-figure supplement 1.**

**Body temperature curve of all infected pigs.**

The body temperatures of Non-TG (120, 141, 159, 191 and 211) and TG pigs (11, 19, 24, 49 and 78) were measured at 24 h intervals before FMDV challenge until the end of the experiment.
